# Supplementary material for: Stability Efficiencies of POSS and Microalgae Extracts on the Durability of Ethylene-Propylene-Diene Monomer Based Hybrids
Source: MDPI journal article supplement (doi:10.3390/polym14010187), 2022-01-03
Supplement: s1 [file s1]

## Figures

**Figure S1.** Evolution of CL emission for Ov-POSS powder at 150 °C measured during

nonisothermal determinations.

Heating rate: 10 °C min<sup>-1</sup>.

**Figure S2.** Isothermal CL spectra recorded on two different EPDM hybrids

(1) EPDM/Ov-POSS 1; (2) EPDM/Ov-POSS 5

Temperature 170 °C; dose 0 kGy.

**Figure S3.** Nonisothermal CL records on different EPDM hybrids

(1) EPDM neat; (2) EPDM/Ov-POSS 5; (3) EPDM/*Spirulina platensis*;  
(4) EPDM/*Chlorella vulgaris*; (5) EPDM/Ov-POSS 1.

Dose: 0 kGy. Heating rate: 15 °C min<sup>-1</sup>

**Figure S4.** Nonisothermal CL records on different EPDM hybrids

(1) EPDM neat; (2) EPDM/Ov-POSS 5; (3) EPDM/*Spirulina platensis*;  
(4) EPDM/*Chlorella vulgaris*; (5) EPDM/Ov-POSS 1.

Dose: 0 kGy. Heating rate: 5 °C min<sup>-1</sup>

**Figure S5.** Isothermal CL spectra recorded on unirradiated EPDM hybrid composites

(1) 160 °C, (2) 170 °C, (3) 180 °C.

(a) pristine EPDM; (b) EPDM/POSS 1; (c) EPDM/*Chlorella vulgaris*;  
(d) EPDM/*Spirulina platensis*; (e) EPDM/POSS 5/*Chlorella vulgaris*;  
(f) EPDM/POSS/*Spirulina platensis*; (g) EPDM/POSS 5.

**Figure S6.** Nonisothermal CL spectra ascribed to EPDM modified with algal extract

(1) 0 kGy; (2) 25 kGy; (3) 100 kGy

EPDM/POSS 5/*Chlorella vulgaris*: (a) 3.7 °C min<sup>-1</sup>; (b) 5.0 °C min<sup>-1</sup>;

(c) 10.0 °C min<sup>-1</sup>; (d) 15.0 °C min<sup>-1</sup>.

EPDM/POSS 5/ *Spirulina platensis*: (e) 3.7 °C min<sup>-1</sup>; (f) 5.0 °C min<sup>-1</sup>;

(g) 10.0 °C min<sup>-1</sup>; (h) 15.0 °C min<sup>-1</sup>.

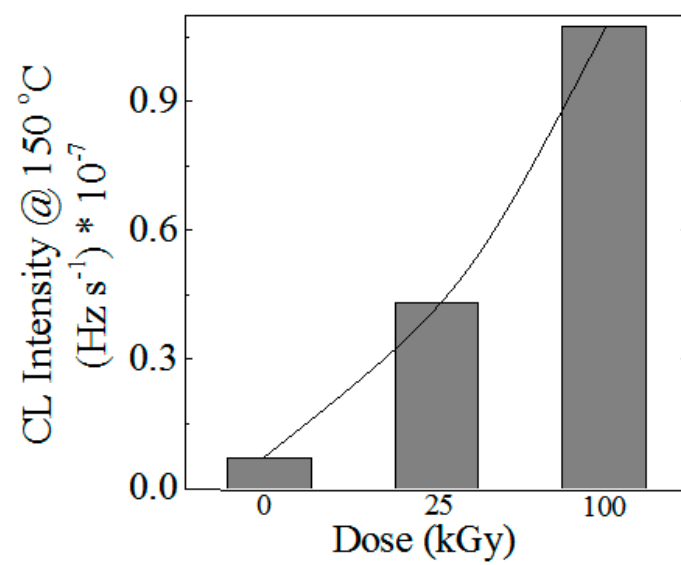

**Figure S1.**

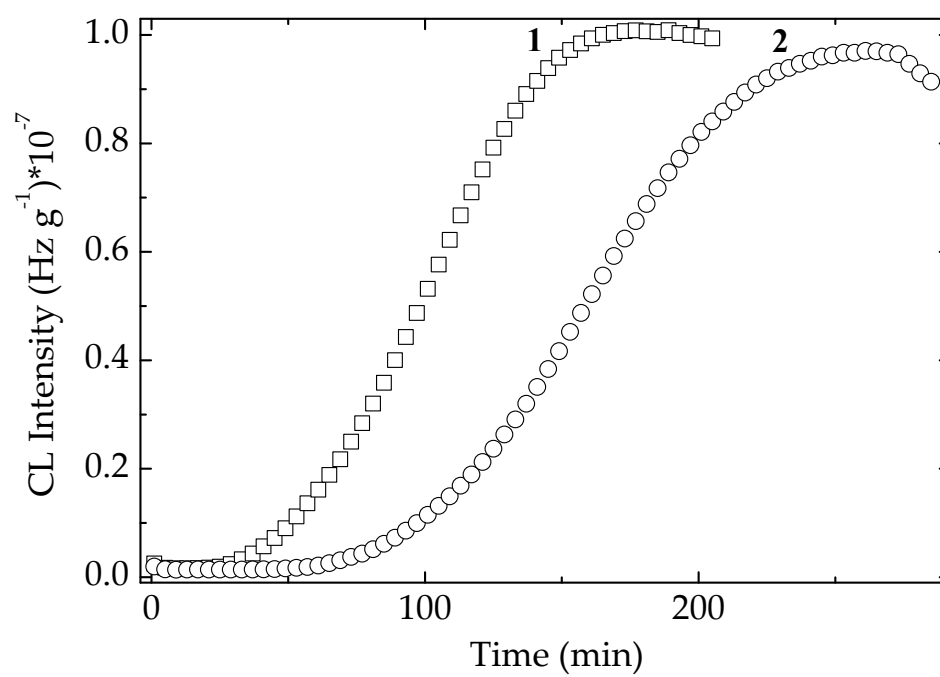

**Figure S2**

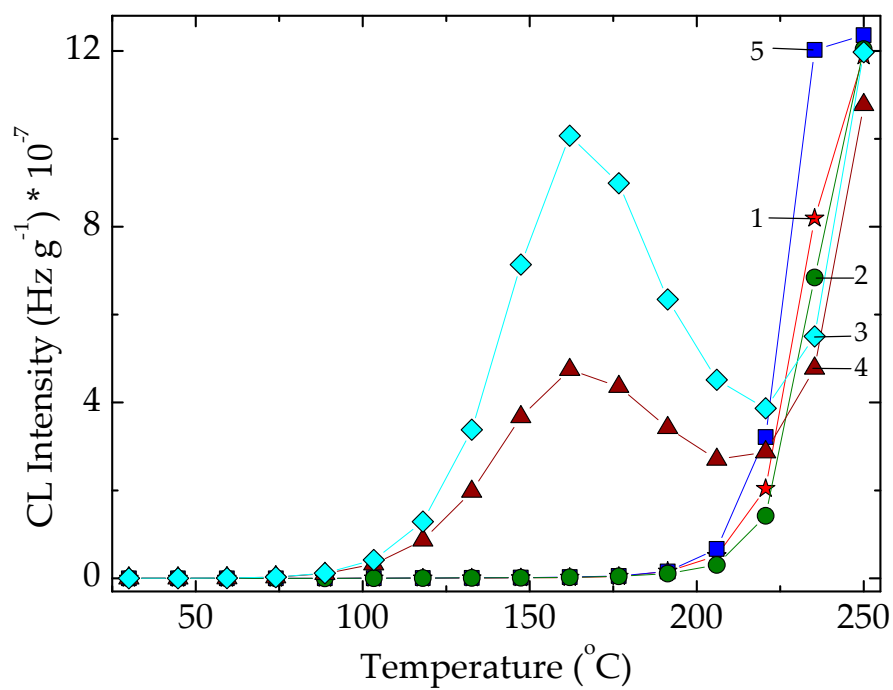

**Figure S3.**

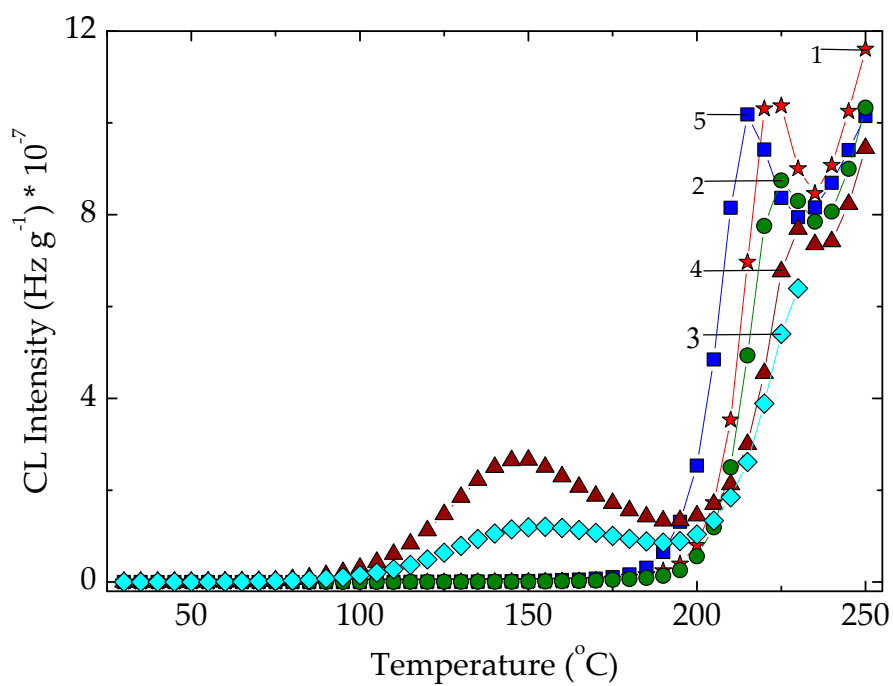

**Figure S4.**

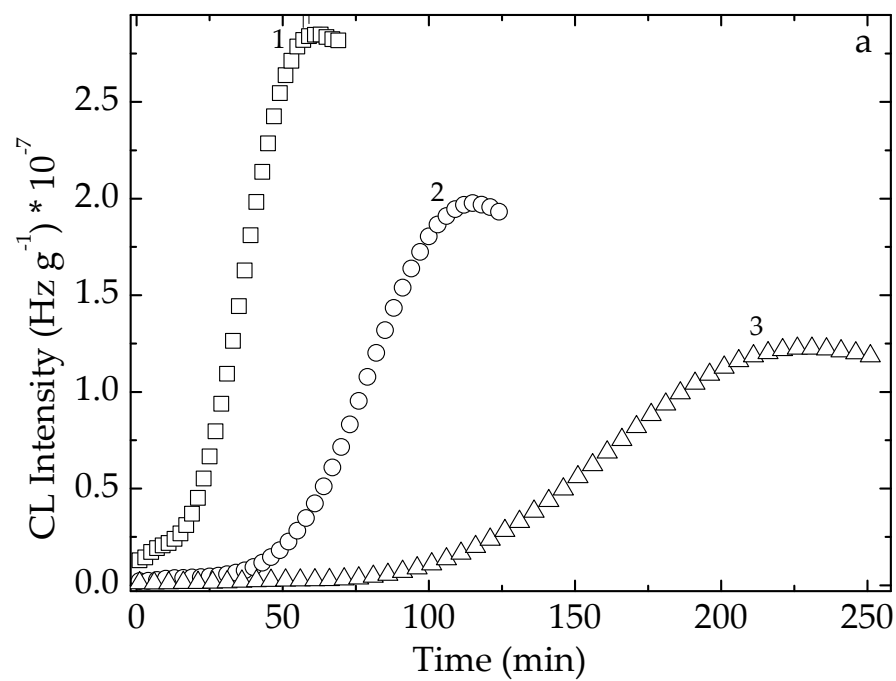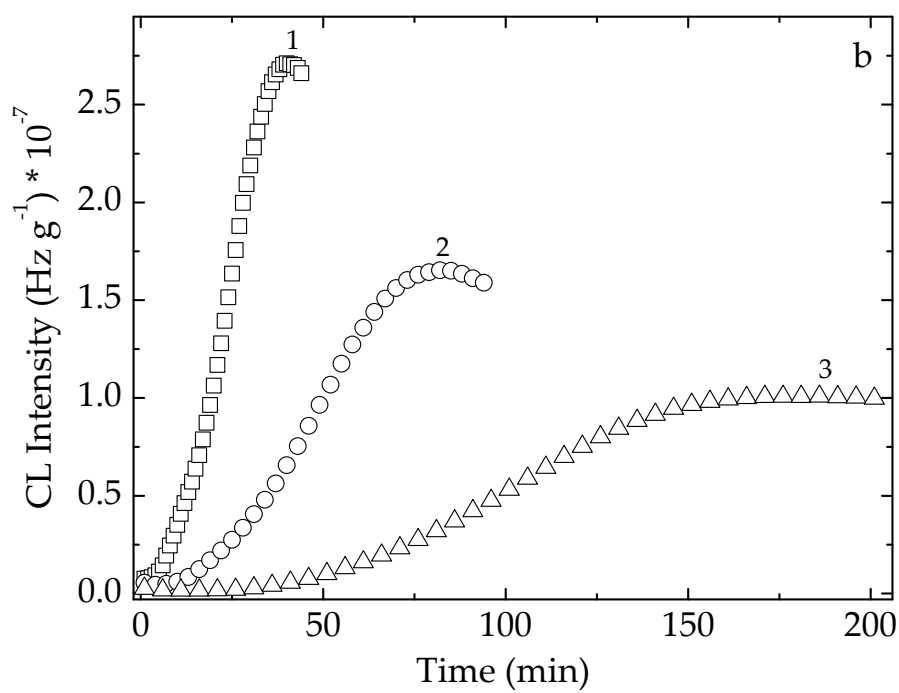

**Figure S5.**

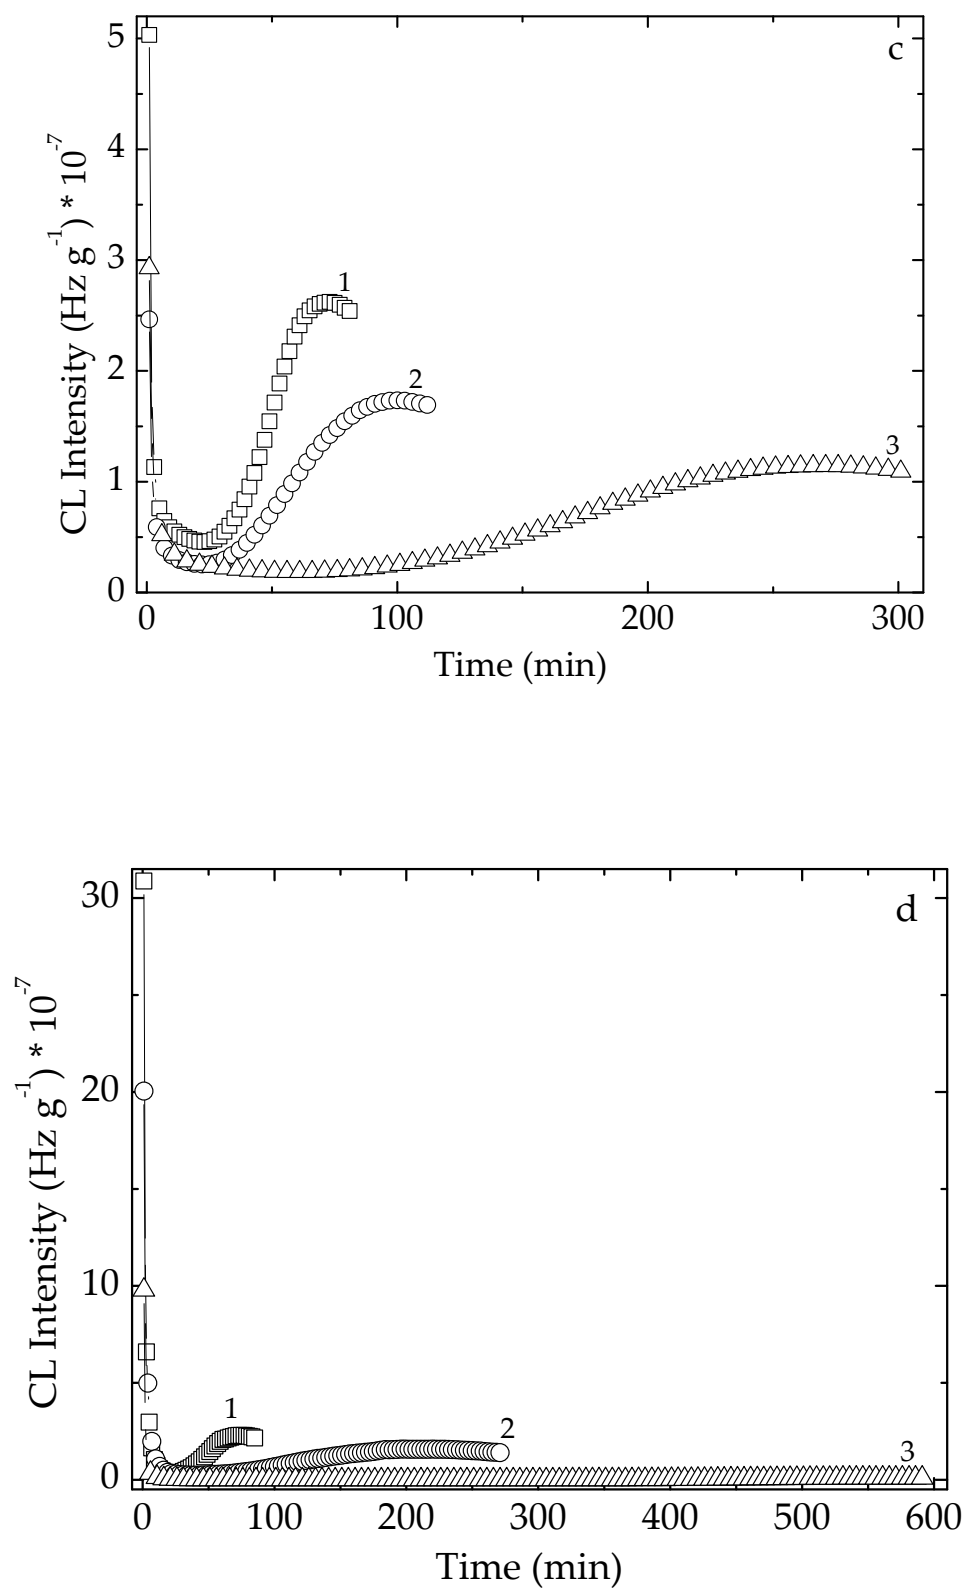

**Figure S5. To be continued**

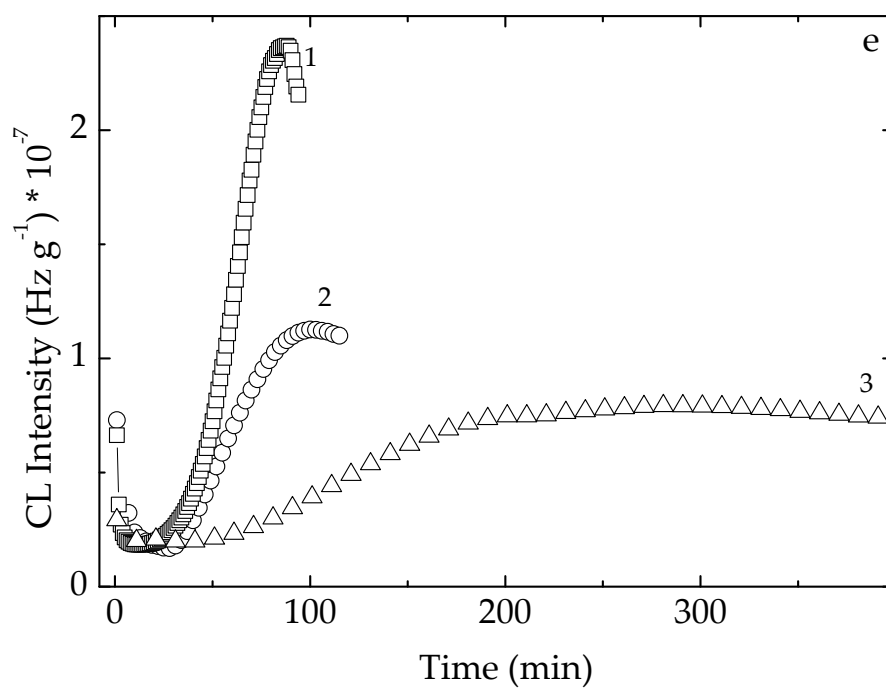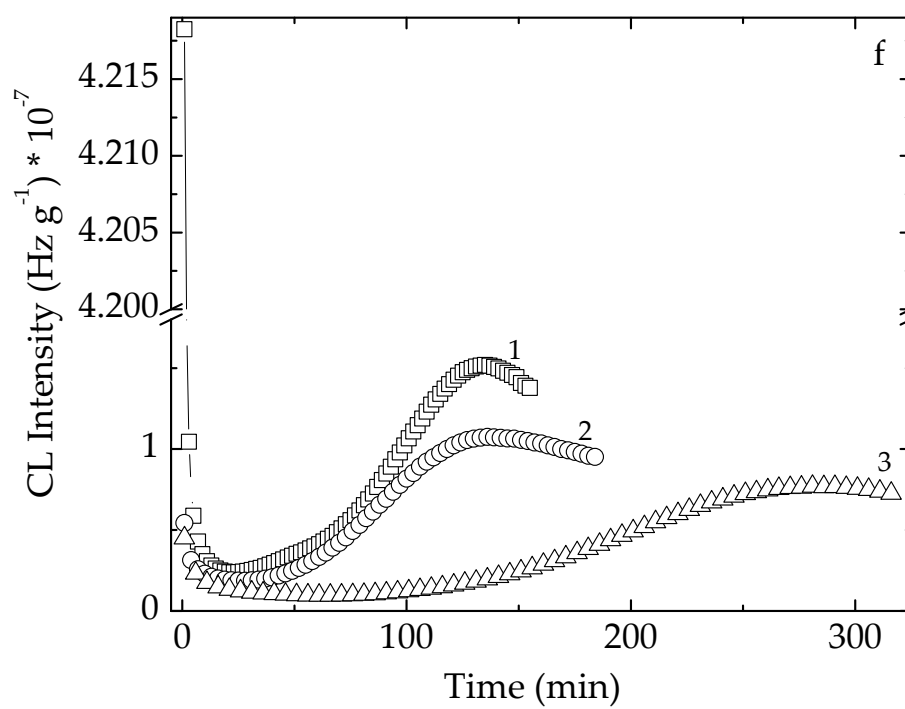

**Figure S5.** To be continued

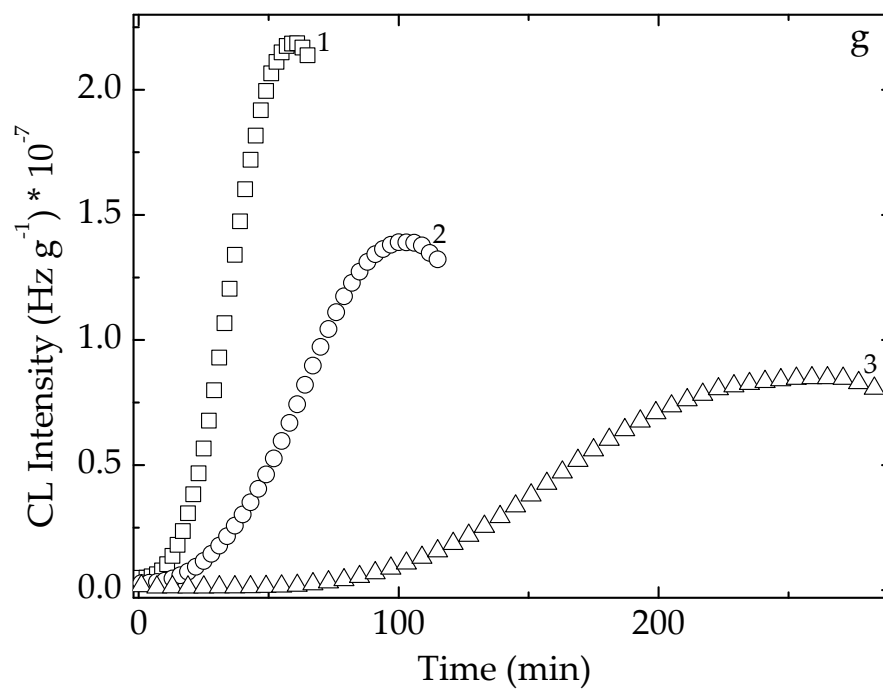

**Figure S5.** To be continued

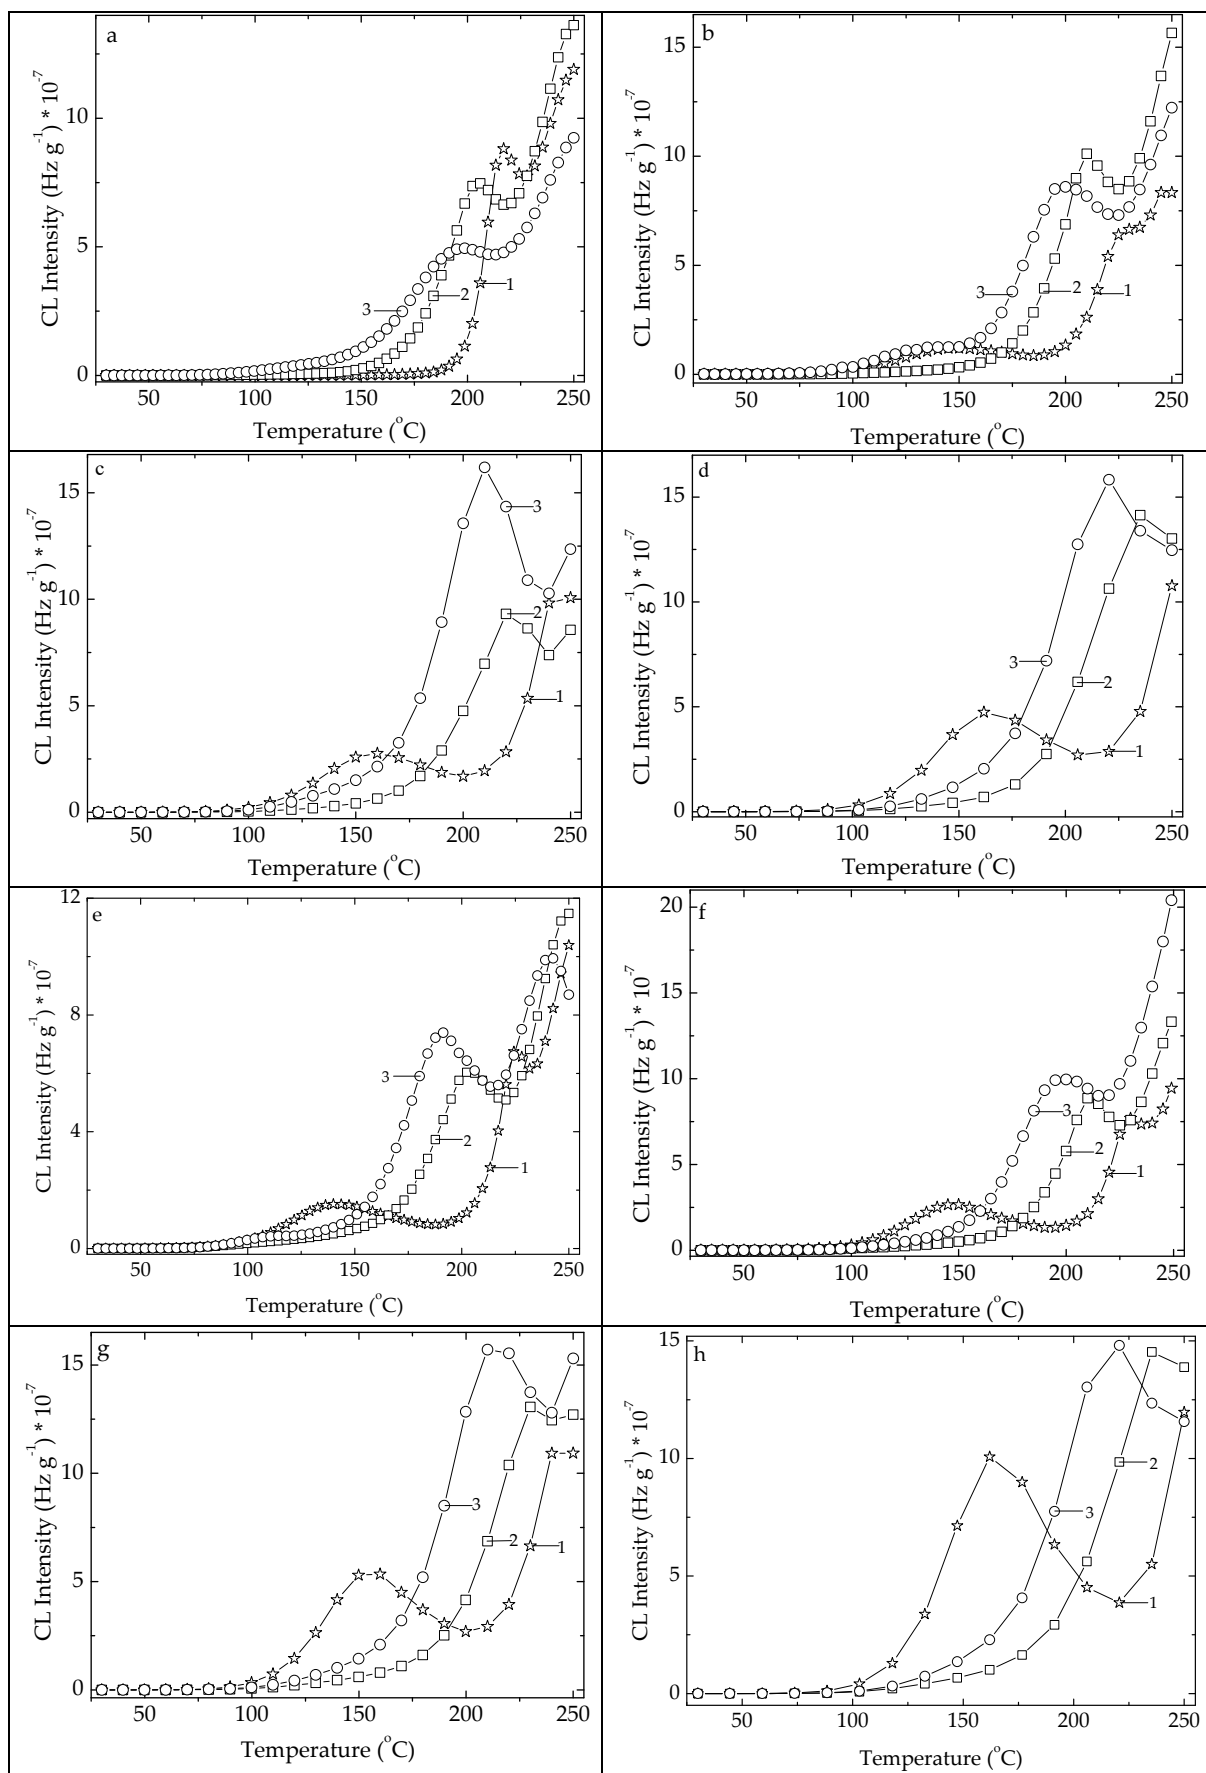

**Figure S6.**



## Table

Table S1. OOT values and their correlation

| Dose<br>(kGy) | OOT (K)                  |                          |                           |                           | Correlation factor |
|---------------|--------------------------|--------------------------|---------------------------|---------------------------|--------------------|
|               | 3.7 °C min <sup>-1</sup> | 5.0 °C min <sup>-1</sup> | 10.0 °C min <sup>-1</sup> | 15.0 °C min <sup>-1</sup> |                    |
| 0             | 423                      | 433                      | 448                       | 453                       | 0.98287            |
| 25            | 418                      | 428                      | 443                       | 451                       | 0.99240            |
| 100           | 413                      | 423                      | 438                       | 450                       | 0.99578            |
